# Supplementary material
Source: PubMed Central journal article supplement (PMC5526719)
Supplement: NIHMS880475-supplement-1.pdf [file NIHMS880475-supplement-1.pdf]

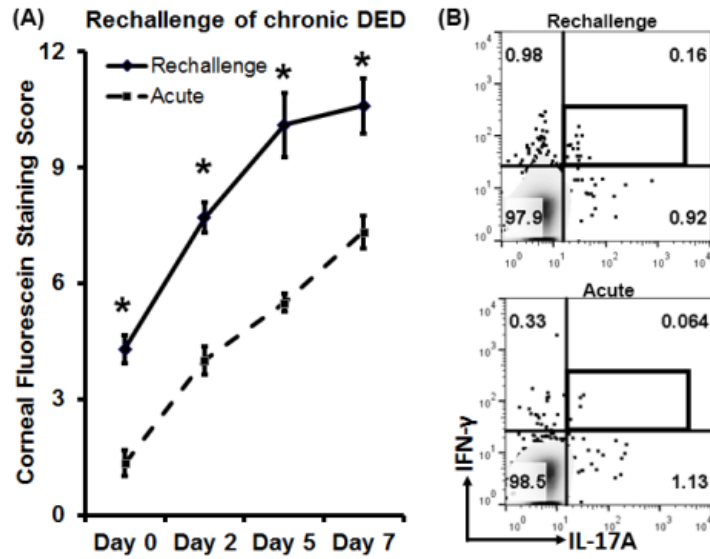

**Supplemental Figure 1. Re-challenge of chronic DED.** Chronic DED or naïve mice (control) were challenged with desiccating environmental stress for 7 days. (A) DED severity was evaluated by corneal fluorescein staining scores. (n = 10 for re-challenge group and n = 6 for acute group). \*, p < 0.05 as compared to the control group. (B) Flow cytometry plots show the IL-17A<sup>+</sup>IFN- $\gamma$ <sup>+</sup> double-positive Th17/1 cell frequencies at day 7.

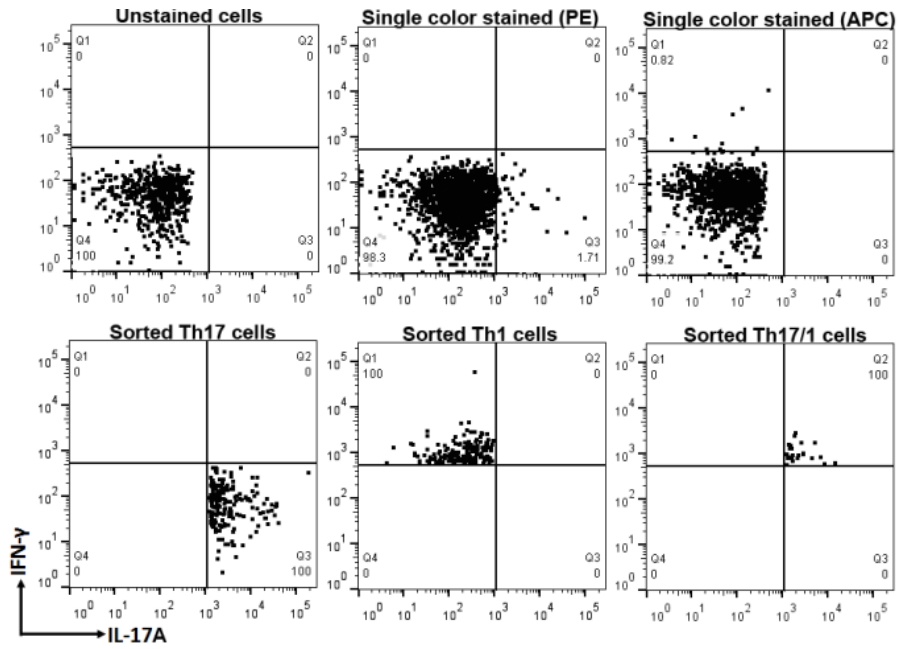

**Supplemental Figure 2. Sorted Th17, Th1, and Th17/1 cells from DED draining lymph nodes.** Flow cytometry plots show the staining controls for the cell sorting (upper panel) and the cytokine expressions for each type of sorted cells before their transfer (lower panel).

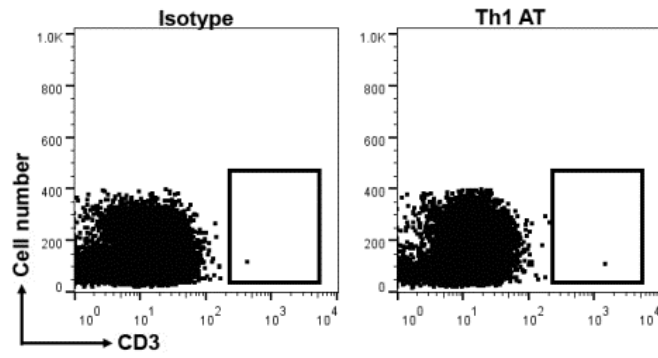

**Supplemental Figure 3. CD3<sup>+</sup> T cells in the draining lymph nodes of Rag1 KO mice.** Flow cytometry plots show no CD3<sup>+</sup> T cells in the draining lymph nodes in Rag1 KO mice receiving single-positive Th1 cells. AT, adoptive transfer.
